# Supplementary material for: Efficacy of platelet-rich plasma injections in osteoarthritis of the knee: a systematic review and meta-analysis
Source: HighWire-hosted journal article supplement (doi:10.1136/bjsports-2014-094036), 2014-11-21
Supplement: bjsports-2014-094036supp2.pdf [file bjsports-2014-094036supp2.pdf]

## Effect estimates overview

### Comparison 1 Platelet rich plasma versus placebo

| Outcome or Subgroup                                                  | Studies | Participants | Statistical Method                  | Effect Estimate      |
|----------------------------------------------------------------------|---------|--------------|-------------------------------------|----------------------|
| 1.1 Pain: WOMAC pain subscale (single PRP vs Saline)                 | 1       |              | Mean Difference (IV, Fixed, 95% CI) | Subtotals only       |
| 1.1.1 6 weeks post injection                                         | 1       | 49           | Mean Difference (IV, Fixed, 95% CI) | Not estimable        |
| 1.1.2 3 months post injection                                        | 1       | 49           | Mean Difference (IV, Fixed, 95% CI) | Not estimable        |
| 1.1.3 6 months post injection                                        | 1       | 49           | Mean Difference (IV, Fixed, 95% CI) | Not estimable        |
| 1.2 Pain: WOMAC pain subscale (2 PRP vs Saline)                      | 1       |              | Mean Difference (IV, Fixed, 95% CI) | Subtotals only       |
| 1.2.1 6 weeks post injection                                         | 1       | 48           | Mean Difference (IV, Fixed, 95% CI) | Not estimable        |
| 1.2.2 3 months post injection                                        | 1       | 48           | Mean Difference (IV, Fixed, 95% CI) | Not estimable        |
| 1.2.3 6 months post injection                                        | 1       | 48           | Mean Difference (IV, Fixed, 95% CI) | Not estimable        |
| 1.3 Pain: Visual Analogue Scale ( Single PRP vs Saline)              | 1       |              | Mean Difference (IV, Fixed, 95% CI) | Subtotals only       |
| 1.3.1 6 months post injection                                        | 1       | 98           | Mean Difference (IV, Fixed, 95% CI) | -2.45 [-2.92, -1.98] |
| 1.4 Pain: Visual Analogue Scale (2 PRP vs Saline)                    | 1       |              | Mean Difference (IV, Fixed, 95% CI) | Subtotals only       |
| 1.4.1 6 months post injection                                        | 1       | 96           | Mean Difference (IV, Fixed, 95% CI) | -2.07 [-2.59, -1.55] |
| 1.5 Function: WOMAC physical function subscale (Single PRP vs Salin) | 1       |              | Mean Difference (IV, Fixed, 95% CI) | Subtotals only       |
| 1.5.1 6 weeks post injection                                         | 1       | 49           | Mean Difference (IV, Fixed, 95% CI) | Not estimable        |
| 1.5.2 3 months post injection                                        | 1       | 49           | Mean Difference (IV, Fixed, 95% CI) | Not estimable        |
| 1.5.3 6 months post injection                                        | 1       | 49           | Mean Difference (IV, Fixed, 95% CI) | Not estimable        |
| 1.6 Function: WOMAC physical function subscale (2 PRP vs Saline)     | 1       |              | Mean Difference (IV, Fixed, 95% CI) | Subtotals only       |
| 1.6.1 6 weeks post injection                                         | 1       | 48           | Mean Difference (IV, Fixed, 95% CI) | Not estimable        |
| 1.6.2 3 months post injection                                        | 1       | 48           | Mean Difference (IV, Fixed, 95% CI) | Not estimable        |
| 1.6.3 6 months post injection                                        | 1       | 48           | Mean Difference (IV, Fixed, 95% CI) | Not estimable        |
| 1.7 Function: WOMAC total (Single PRP vs Saline)                     | 1       |              | Mean Difference (IV, Fixed, 95% CI) | Subtotals only       |
| 1.7.1 6 weeks post injection                                         | 1       | 49           | Mean Difference (IV, Fixed, 95% CI) | Not estimable        |

|                                                                                                                        |   |    |                                     |                      |
|------------------------------------------------------------------------------------------------------------------------|---|----|-------------------------------------|----------------------|
| 1.7.2 3 months post injection                                                                                          | 1 | 49 | Mean Difference (IV, Fixed, 95% CI) | Not estimable        |
| 1.7.3 6 months post injection                                                                                          | 1 | 49 | Mean Difference (IV, Fixed, 95% CI) | Not estimable        |
| 1.8 Function: WOMAC total (2 PRP vs Saline)                                                                            | 1 |    | Mean Difference (IV, Fixed, 95% CI) | Subtotals only       |
| 1.8.1 6 weeks post injection                                                                                           | 1 | 48 | Mean Difference (IV, Fixed, 95% CI) | Not estimable        |
| 1.8.2 3 months post injection                                                                                          | 1 | 48 | Mean Difference (IV, Fixed, 95% CI) | Not estimable        |
| 1.8.3 6 months post injection                                                                                          | 1 | 48 | Mean Difference (IV, Fixed, 95% CI) | Not estimable        |
| 1.9 Global assessment: patient satisfaction, number of patients that were satisfied (Single PRP vs Saline)             | 1 |    | Risk Ratio (M-H, Fixed, 95% CI)     | Subtotals only       |
| 1.9.1 6 months post injection                                                                                          | 1 | 49 | Risk Ratio (M-H, Fixed, 95% CI)     | 8.40 [2.19, 32.24]   |
| 1.10 Global assessment: patient satisfaction, number of patients that were satisfied (2 PRP vs Saline)                 | 1 |    | Risk Ratio (M-H, Fixed, 95% CI)     | Subtotals only       |
| 1.10.1 6 months post injection                                                                                         | 1 | 48 | Risk Ratio (M-H, Fixed, 95% CI)     | 7.82 [2.02, 30.20]   |
| 1.11 WOMAC stiffness subscale (Single PRP vs Saline)                                                                   | 1 |    | Mean Difference (IV, Fixed, 95% CI) | Subtotals only       |
| 1.11.1 6 weeks post injection                                                                                          | 1 | 49 | Mean Difference (IV, Fixed, 95% CI) | Not estimable        |
| 1.11.2 3 months post injection                                                                                         | 1 | 49 | Mean Difference (IV, Fixed, 95% CI) | Not estimable        |
| 1.11.3 6 months post injection                                                                                         | 1 | 49 | Mean Difference (IV, Fixed, 95% CI) | Not estimable        |
| 1.12 WOMAC stiffness subscale (2 PRP vs Saline)                                                                        | 1 |    | Mean Difference (IV, Fixed, 95% CI) | Subtotals only       |
| 1.12.1 6 weeks post injection                                                                                          | 1 | 48 | Mean Difference (IV, Fixed, 95% CI) | Not estimable        |
| 1.12.2 3 months post injection                                                                                         | 1 | 48 | Mean Difference (IV, Fixed, 95% CI) | Not estimable        |
| 1.12.3 6 months post injection                                                                                         | 1 | 48 | Mean Difference (IV, Fixed, 95% CI) | Not estimable        |
| 1.13 Adverse effects: Number of patients with local or systemic reactions related to treatment ( Single PRP vs Saline) | 1 | 50 | Risk Ratio (M-H, Fixed, 95% CI)     | 11.14 [0.66, 187.75] |
| 1.14 Adverse effects: Number of patients with local or systemic reactions related to treatment (2 PRP vs Saline)       | 1 | 48 | Risk Ratio (M-H, Fixed, 95% CI)     | 21.23 [1.32, 341.04] |

---

## Comparison 2 Platelet rich plasma versus Hyaluronic Acid

| Outcome or Subgroup                                                                    | Studies | Participants | Statistical Method                       | Effect Estimate      |
|----------------------------------------------------------------------------------------|---------|--------------|------------------------------------------|----------------------|
| 2.1 Pain: Number of patients with 30% decrease on WOMAC pain subscale                  | 1       |              | Risk Ratio (M-H, Fixed, 95% CI)          | Subtotals only       |
| 2.1.1 6 months post injection                                                          | 1       | 96           | Risk Ratio (M-H, Fixed, 95% CI)          | 5.71 [2.85, 11.46]   |
| 2.1.2 12 months post injection                                                         | 1       | 90           | Risk Ratio (M-H, Fixed, 95% CI)          | 4.90 [2.08, 11.54]   |
| 2.2 Pain: Number of patients with 50% decrease on WOMAC pain subscale                  | 2       |              | Risk Ratio (M-H, Fixed, 95% CI)          | Subtotals only       |
| 2.2.1 6 months post injection                                                          | 2       | 272          | Risk Ratio (M-H, Fixed, 95% CI)          | 2.27 [1.53, 3.38]    |
| 2.2.2 12 months post injection                                                         | 1       | 90           | Risk Ratio (M-H, Fixed, 95% CI)          | 13.13 [1.81, 95.20]  |
| 2.3 Pain: WOMAC pain subscale                                                          | 2       |              | Std. Mean Difference (IV, Fixed, 95% CI) | Subtotals only       |
| 2.3.1 6 months post injection                                                          | 2       | 272          | Std. Mean Difference (IV, Fixed, 95% CI) | -0.53 [-0.77, -0.28] |
| 2.3.2 12 months post injection                                                         | 1       | 90           | Std. Mean Difference (IV, Fixed, 95% CI) | -1.25 [-1.70, -0.80] |
| 2.4 Function: Number of patients with 30% decrease on WOMAC physical function subscale | 1       |              | Risk Ratio (M-H, Fixed, 95% CI)          | Subtotals only       |
| 2.4.1 6 months post injection                                                          | 1       | 96           | Risk Ratio (M-H, Fixed, 95% CI)          | 4.14 [2.01, 8.53]    |
| 2.4.2 12 months post injection                                                         | 1       | 90           | Risk Ratio (M-H, Fixed, 95% CI)          | 3.25 [1.57, 6.71]    |
| 2.5 Function: Number of patients with 50% decrease on WOMAC physical function subscale | 1       |              | Risk Ratio (M-H, Fixed, 95% CI)          | Subtotals only       |
| 2.5.1 6 months post injection                                                          | 1       | 96           | Risk Ratio (M-H, Fixed, 95% CI)          | 3.80 [1.54, 9.35]    |
| 2.5.2 12 months post injection                                                         | 1       | 90           | Risk Ratio (M-H, Fixed, 95% CI)          | 27.20 [1.68, 441.24] |
| 2.6 Function: WOMAC physical function subscale                                         | 2       |              | Std. Mean Difference (IV, Fixed, 95% CI) | Subtotals only       |
| 2.6.1 6 months post injection                                                          | 2       | 272          | Std. Mean Difference (IV, Fixed, 95% CI) | -0.41 [-0.65, -0.17] |
| 2.6.2 12 months post injection                                                         | 1       | 90           | Std. Mean Difference (IV, Fixed, 95% CI) | -1.32 [-1.78, -0.86] |
| 2.7 Function: WOMAC total                                                              | 4       |              | Std. Mean Difference (IV, Fixed, 95% CI) | Subtotals only       |
| 2.7.1 1 month post injection                                                           | 1       | 120          | Std. Mean Difference (IV, Fixed, 95% CI) | -0.37 [-0.73, -0.00] |
| 2.7.2 3 months post injection                                                          | 2       | 150          | Std. Mean Difference (IV, Fixed, 95% CI) | -0.93 [-1.27, -0.59] |
| 2.7.3 6 months post injection                                                          | 4       | 422          | Std. Mean Difference (IV, Fixed, 95% CI) | -0.81 [-1.02, -0.61] |
| 2.7.4 12 months post injection                                                         | 1       | 90           | Std. Mean Difference (IV, Fixed, 95% CI) | -1.34 [-1.80, -0.88] |

|                                                                                                |   |     |                                     |                      |
|------------------------------------------------------------------------------------------------|---|-----|-------------------------------------|----------------------|
| 2.8 Function: Number of patients with 30% decrease on Lequesne index                           | 1 |     | Risk Ratio (M-H, Fixed, 95% CI)     | Subtotals only       |
| 2.8.1 6 months post injection                                                                  | 1 | 96  | Risk Ratio (M-H, Fixed, 95% CI)     | 5.00 [2.47, 10.13]   |
| 2.8.2 12 months post injection                                                                 | 1 | 90  | Risk Ratio (M-H, Fixed, 95% CI)     | 20.13 [2.84, 142.71] |
| 2.9 Function: Number of patients with 50% decrease on Lequesne index                           | 1 |     | Risk Ratio (M-H, Fixed, 95% CI)     | Subtotals only       |
| 2.9.1 6 months post injection                                                                  | 1 | 96  | Risk Ratio (M-H, Fixed, 95% CI)     | 7.00 [1.68, 29.15]   |
| 2.9.2 12 months post injection                                                                 | 1 | 90  | Risk Ratio (M-H, Fixed, 95% CI)     | 7.88 [1.04, 59.61]   |
| 2.10 Function: Lequesne index (0-24 Likert)                                                    | 3 |     | Mean Difference (IV, Fixed, 95% CI) | Subtotals only       |
| 2.10.1 3 months post injection                                                                 | 1 | 30  | Mean Difference (IV, Fixed, 95% CI) | 0.10 [-1.48, 1.68]   |
| 2.10.2 6 months post injection                                                                 | 3 | 302 | Mean Difference (IV, Fixed, 95% CI) | -1.24 [-1.90, -0.58] |
| 2.10.3 12 months post injection                                                                | 1 | 90  | Mean Difference (IV, Fixed, 95% CI) | -5.50 [-7.05, -3.95] |
| 2.11 Adverse effects: Number of patients with local or systemic reactions related to treatment | 3 | 302 | Risk Ratio (M-H, Fixed, 95% CI)     | 1.00 [0.65, 1.53]    |

### Comparison 3 Platelet rich plasma versus Hyaluronic Acid (non-randomized trials)

| Outcome or Subgroup                                  | Studies | Participants | Statistical Method                       | Effect Estimate      |
|------------------------------------------------------|---------|--------------|------------------------------------------|----------------------|
| 3.1 Pain: Visual Analogue Scale/Numeric Rating Scale | 2       |              | Std. Mean Difference (IV, Fixed, 95% CI) | Subtotals only       |
| 3.1.1 3 months post injection                        | 2       | 210          | Std. Mean Difference (IV, Fixed, 95% CI) | -1.03 [-1.31, -0.74] |
| 3.1.2 6 months post injection                        | 2       | 210          | Std. Mean Difference (IV, Fixed, 95% CI) | -0.92 [-1.20, -0.63] |
| 3.2 Function: WOMAC total                            | 1       |              | Mean Difference (IV, Fixed,              | Subtotals only       |

|                                                                                                             |   |     |                                     |                        |
|-------------------------------------------------------------------------------------------------------------|---|-----|-------------------------------------|------------------------|
|                                                                                                             |   |     | 95% CI)                             |                        |
| 3.2.1 3 months post injection                                                                               | 1 | 120 | Mean Difference (IV, Fixed, 95% CI) | -11.82 [-17.51, -6.13] |
| 3.2.2 6 months post injection                                                                               | 1 | 120 | Mean Difference (IV, Fixed, 95% CI) | -12.05 [-17.55, -6.55] |
| 3.3 Global assessment: Patient satisfaction, number of patients that were satisfied (PRP vs High Weight HA) | 1 |     | Risk Ratio (M-H, Fixed, 95% CI)     | Subtotals only         |
| 3.3.1 6 months post injection                                                                               | 1 | 100 | Risk Ratio (M-H, Fixed, 95% CI)     | 1.24 [0.98, 1.58]      |
| 3.4 Global assessment: Patient satisfaction, number of patients that were satisfied (PRP vs Low Weight HA)  | 1 |     | Risk Ratio (M-H, Fixed, 95% CI)     | Subtotals only         |
| 3.4.1 6 months post injection                                                                               | 1 | 100 | Risk Ratio (M-H, Fixed, 95% CI)     | 1.28 [1.00, 1.64]      |
| 3.5 Adverse effects: number of patients with local or systemic reactions related to treatment               | 1 | 60  | Risk Ratio (M-H, Fixed, 95% CI)     | 13.00 [0.76, 220.96]   |

**Comparison 4 Platelet rich plasma -single spinning- versus Platelet rich plasma -double spinning- (non-randomized trials)**

| Outcome or Subgroup                                                                 | Studies | Participants | Statistical Method              | Effect Estimate   |
|-------------------------------------------------------------------------------------|---------|--------------|---------------------------------|-------------------|
| 4.1 Global assessment: Patient satisfaction, number of patients that were satisfied | 1       |              | Risk Ratio (M-H, Fixed, 95% CI) | Subtotals only    |
| 4.1.1 12 months post injection                                                      | 1       | 144          | Risk Ratio (M-H, Fixed, 95% CI) | 1.05 [0.89, 1.25] |
