# Supplementary material for: Efficacy of platelet-rich plasma injections in osteoarthritis of the knee: a systematic review and meta-analysis
Source: HighWire-hosted journal article supplement (doi:10.1136/bjsports-2014-094036), 2014-11-21
Supplement: bjsports-2014-094036supp3.pdf [file bjsports-2014-094036supp3.pdf]

## Characteristics of included and excluded studies

### Characteristics of included studies

| <b>Cerza 2012</b>                   |                                                                                                                                                                                                                                                                                                                                                                                                                                                                                                                                   |
|-------------------------------------|-----------------------------------------------------------------------------------------------------------------------------------------------------------------------------------------------------------------------------------------------------------------------------------------------------------------------------------------------------------------------------------------------------------------------------------------------------------------------------------------------------------------------------------|
| <b>Study type/Country/Treatment</b> | Randomized, two arm, controlled trial<br>Single Center, Italy<br>PRP versus Hyaluronic Acid,                                                                                                                                                                                                                                                                                                                                                                                                                                      |
| <b>Participants</b>                 | Mean age: 66.4, % Female: 55.8%<br>Mean disease duration: NR<br>Number Randomized: 120<br>Follow-up: 1, 3 and 6 months<br><u>Inclusion:</u><br>Age: NR<br>Duration clinical symptoms : NR<br>Symptomatic OA of the knee , radiological<br><b>Kellgren Lawrence</b> grade I-III<br><u>Baseline values:</u><br>Kellgren Lawrence grade (n(%)):<br>I:<br>PRP: 21(35)<br>HA: 25(42)<br>II:<br>PRP: 24(40)<br>HA: 22(37)<br>III:<br>PRP: 15(25)<br>HA: 13(21)<br>WOMAC score (mean(SD)):<br>Total:<br>PRP: 79.6(9.5)<br>HA: 75.4(10.7) |
| <b>Intervention</b>                 | <u>Intervention (n=60):</u><br>4 PRP (ACP)(type NA) intra articular injections<br>(5,5mL)<br>Interval: weekly<br><u>Comparison (n=60):</u><br>4 HA intra articular injections<br>Interval: weekly                                                                                                                                                                                                                                                                                                                                 |
| <b>Outcomes</b>                     | Primary outcome:<br>WOMAC total score (0-96)<br>Adverse effects                                                                                                                                                                                                                                                                                                                                                                                                                                                                   |
| <b>Results</b>                      | WOMAC total score 1, 3 and 6 months resp.<br>(mean(SD)):<br>PRP:49.6(17.7), 39.1(17.8), 36.5(17.9)<br>HA: 55.2(12.3), 57(11.7), 65.1(10.6)<br>$P<0.001$ , $P<0.001$ , $P<0.001$<br><br>Adverse effects:<br>No short time side effects observed                                                                                                                                                                                                                                                                                    |

### Risk of bias (Cerza 2012)

| Bias | Authors' judgement | Support for judgement |
|------|--------------------|-----------------------|
|------|--------------------|-----------------------|

|                                                        |              |                                                                                                                                                                                                                                                                                           |
|--------------------------------------------------------|--------------|-------------------------------------------------------------------------------------------------------------------------------------------------------------------------------------------------------------------------------------------------------------------------------------------|
| <b>Random sequence generation (selection bias)</b>     | Unclear risk | Quote: "The patients were consecutively randomized..."<br>Comment: The report states that allocation was random. Method of sequence generation process was not specified.<br>Insufficient information about the sequence generation process to permit judgement of low risk or high risk. |
| <b>Allocation concealment (selection bias)</b>         | High risk    | Comment: It is not stated that allocation was concealed. Probably not done                                                                                                                                                                                                                |
| <b>Blinding of participants (performance bias)</b>     | Unclear risk | No reporting regarding blinding the participants.<br>Comment: It is not stated that the participants were blind for treatment.<br>Insufficient information about the blinding of participants to permit judgement of low risk or high risk.                                               |
| <b>Blinding of personnel (performance bias)</b>        | High risk    | Quote: "The injections were performed by the unblinded physician..."<br>Comment: Probably not done                                                                                                                                                                                        |
| <b>Blinding of outcome assessment (detection bias)</b> | Unclear risk | Just reporting that the outcome assessment was managed by the same operator.<br>Comment: Insufficient information about blinding of the observer to permit judgement of low risk or high risk.                                                                                            |
| <b>Incomplete outcome data (attrition bias)</b>        | Low risk     | Number of allocated and analyzed participants was reported.<br>Quote: "No patients withdrew during the study period". In each group the number of subjects analyzed were reported (n=60) and no subjects excluded from analysis.                                                          |
| <b>Selective reporting (reporting bias)</b>            | Low risk     | Pre-specified outcomes have been reported.<br>Primary outcome measures (WOMAC which assess pain, stiffness and fictional limitation) have been reported.                                                                                                                                  |
| <b>Other bias</b>                                      | Unclear risk | Power analysis has been calculated. (33 patients per treat arm to provide at least 80% power to detect an anticipated effect size of 0.8 on WOMACscore).                                                                                                                                  |

**Filardo 2012**

|                                     |                                                                                                                                                                                                                                                                                                                                                                                                                                                                                                                                                                                                                                                                                                  |
|-------------------------------------|--------------------------------------------------------------------------------------------------------------------------------------------------------------------------------------------------------------------------------------------------------------------------------------------------------------------------------------------------------------------------------------------------------------------------------------------------------------------------------------------------------------------------------------------------------------------------------------------------------------------------------------------------------------------------------------------------|
| <b>Study type/Country/Treatment</b> | Randomized, two arm, controlled trial<br>Single Center, Italy<br>PRP versus Hyaluronic Acid                                                                                                                                                                                                                                                                                                                                                                                                                                                                                                                                                                                                      |
| <b>Participants</b>                 | Mean age: 56.5, % Female: 37.6%<br>Mean disease duration: 63.5 months<br>Number Randomized: 109<br>Follow-up: 2, 6 and 12 months<br><u>Inclusion:</u><br>Age: NR<br>Clinical symptoms > 4 months<br>Monolateral symptomatic OA of the knee ,<br>radiological <b>Kellgren Lawrence</b> grade 0-III<br><u>Baseline values:</u><br>Kellgren Lawrence grade (mean):<br>PRP: 2.2<br>HA: 2.1<br>IKDC score (mean(SD)):<br>PRP: 50.2(15.7)<br>HA: 47.4(14.0)<br>Tegner score (mean(SD)):<br>PRP: 2.9(1.4)<br>HA: 2.6(1.2)                                                                                                                                                                               |
| <b>Intervention</b>                 | <u>Intervention (n=54):</u><br>3 PRP (type 2A) intra articular injections (5mL)<br>Interval: weekly<br><u>Comparison (n=55):</u><br>3 HA intra articular injections<br>Interval: weekly                                                                                                                                                                                                                                                                                                                                                                                                                                                                                                          |
| <b>Outcomes</b>                     | <u>Primary outcome(s):</u><br>IKDC score (0-100)<br><u>Secondary outcome(s):</u><br>KOOS score (0-100/category)<br>EQ-VAS (0-100)<br>Tegner score (0-10)<br>Range of motion<br>Knee circumference change<br>Patient satisfaction<br>Adverse effects                                                                                                                                                                                                                                                                                                                                                                                                                                              |
| <b>Results</b>                      | IKDC score 2, 6 and 12 months resp.<br>(mean(SD)):<br>PRP: 62.8(17.6), 64.3(16.4), 64.9(16.8)<br>HA: 61.4(16.2), 61.0(18.2), 61.7(19.0)<br><i>PRP vs. HA: NS</i><br>KOOS score 2,6 and 12 months:<br><i>PRP vs. HA: Ns</i><br>EQ-VAS: NR/NS<br>Tegner score 12 months (mean(SD)):<br>PRP: 3.8(1.3)<br>HA: 3.4(1.6)<br><i>PRP vs. HA: NS</i><br>Range of motion: Not reported<br>Knee circumference: Not reported<br>Patient satisfaction: Not reported<br>Adverse effects:<br>No major complications related to the injections<br>were observed during the treatment and follow-<br>up.<br>Post-injective pain reaction was significantly<br>higher in the PRP group ( $p=0.039$ ). However this |

reaction was self-limiting.

**Risk of bias (Filardo 2012)**

| <b>Bias</b>                                            | <b>Authors' judgement</b> | <b>Support for judgement</b>                                                                                                                                                                                                                                 |
|--------------------------------------------------------|---------------------------|--------------------------------------------------------------------------------------------------------------------------------------------------------------------------------------------------------------------------------------------------------------|
| <b>Random sequence generation (selection bias)</b>     | Low risk                  | Quote: "...according to a randomization list, provide by an independent statistician, was kept in a dedicated office".<br>Comment: Probably done                                                                                                             |
| <b>Allocation concealment (selection bias)</b>         | Low risk                  | Quote: "Physician contacted statistician by a phone call just before the injective procedure".<br>Central allocation (by telephone)<br>Comment: Probably done                                                                                                |
| <b>Blinding of participants (performance bias)</b>     | Low risk                  | Quote: "At the end of the study, the nature of the injected substance was revealed to the patients.<br>Further: No dosage differences between groups. All of the participants underwent blood harvesting to obtain autologous PRP.<br>Comment: Probably done |
| <b>Blinding of personnel (performance bias)</b>        | High risk                 | Physician was not blinded. Just before the injective procedure he got informed about the treatment allocation.<br>Comment: Probably not done                                                                                                                 |
| <b>Blinding of outcome assessment (detection bias)</b> | Low risk                  | Quote: "All the clinical evaluations were performed by a medical member of staff not involved in the injective procedure"<br>Comment: Blinding is reported and probably done.                                                                                |
| <b>Incomplete outcome data (attrition bias)</b>        | High risk                 | Number of allocated and analyzed participants was reported.<br>0/54 missing from PRP group, 3/55 missing from the HA group (2 due to suspected intolerance to some components of HA and 1 due to lack of efficacy).                                          |
| <b>Selective reporting (reporting bias)</b>            | Unclear risk              | Primary outcomes are reported. Not all pre-specified secondary outcomes have been reported.<br>Outcome of EQVAS, ROM, knee circumference and patients satisfaction are not reported.                                                                         |
| <b>Other bias</b>                                      | Unclear risk              | Power analysis have been calculated. (96 patients per treat arm to provide at least 80% power to detect a difference of 6.7 points of the IKDC score at a 5 % level of significance and possible drop                                                        |

**Filardo/Kon/Ruiz 2012**

|                                     |                                                                                                                                                                                                                                                                                                                                                                                                                                                                                                                                                                                                     |
|-------------------------------------|-----------------------------------------------------------------------------------------------------------------------------------------------------------------------------------------------------------------------------------------------------------------------------------------------------------------------------------------------------------------------------------------------------------------------------------------------------------------------------------------------------------------------------------------------------------------------------------------------------|
| <b>Study type/Country/Treatment</b> | Prospective, two arm, comparative trial<br>Multicenter, Italy<br>PRGF (double spinning) versus PRP (single spinning)                                                                                                                                                                                                                                                                                                                                                                                                                                                                                |
| <b>Participants</b>                 | Mean age: 52.1, % Female: 34%<br>Mean disease duration: NR<br>Number of participants: 144<br>Follow-up: 2, 6 and 12 months<br><u>Inclusion:</u><br>Age > NR<br>Duration clinical symptoms : > 4 months<br>Symptomatic OA of the knee, radiological<br><b>Kellgren Lawrence</b> grade 0-IV<br><u>Baseline values:</u><br>Kellgren Lawrence grade (N(%)):<br>0 (cartilage degeneration):<br>PRP: 32(44%)<br>PRGF: 31(43%)<br>I-III (early OA):<br>PRP: 24(33%)<br>PRGF: 30(42%)<br>VI(advanced OA):<br>PRP: 16(22%)<br>PRGF: 11(15%)<br>IKDC score (mean(SD)):<br>PRP: 42.1(13.5)<br>PRGF: 45.0(10.1) |
| <b>Intervention</b>                 | <u>Intervention (n=72):</u><br>3 PRP (type 2B) intra articular injections (5mL)<br>Interval: 3 weeks<br><u>Comparison (n=72):</u><br>3 PRP (type 4B, PRGF) intra articular injections (5mL)<br>Interval: 3 weeks                                                                                                                                                                                                                                                                                                                                                                                    |
| <b>Outcomes</b>                     | <u>Primary outcome(s):</u><br>IKDC score (0-100)<br>EQ VAS score (0-100)<br>Tegner score (0-10)<br><u>Secondary outcome(s):</u><br>Patient satisfaction (%N)<br>Adverse effects                                                                                                                                                                                                                                                                                                                                                                                                                     |
| <b>Results</b>                      | IKDC score 2, 6 and 12 months<br>resp.(mean(SD)):<br>PRP:60.8(16.6), 62.5(19.9), 59.9(20)<br>PRGF: 59(16.2), 61.3(16.3), 61.6(16.2)<br><i>PRP vs. PRGF NS at all follow-up</i><br>EQ-VAS score: Not reported<br>PRP vs. PRGF: NS<br>Tegner score: Not reported<br>PRP vs. PRGF: NS<br>Patient satisfaction:<br>PRP: 80.6%<br>PRGF:76.4%<br>Adverse effects:<br>No short or long time side effects observed                                                                                                                                                                                          |

Pain (P=0.0005) and swelling (P=0.03) after injection were more frequent in the PRP group with respect to the PRGF group.

**Risk of bias (Filardo/Kon/Ruiz 2012)**

| <b>Bias</b>                                            | <b>Authors' judgement</b> | <b>Support for judgement</b>                                                                                                                                                                              |
|--------------------------------------------------------|---------------------------|-----------------------------------------------------------------------------------------------------------------------------------------------------------------------------------------------------------|
| <b>Random sequence generation (selection bias)</b>     | High risk                 | Hospital visit specified treatment.<br>Comment: Probably not done                                                                                                                                         |
| <b>Allocation concealment (selection bias)</b>         | High risk                 | Quote: "...treatment allocation was due to the center the patients attended".<br>Comment: Probably not done                                                                                               |
| <b>Blinding of participants (performance bias)</b>     | High risk                 | Not reported.<br>Comment: Probably not done                                                                                                                                                               |
| <b>Blinding of personnel (performance bias)</b>        | High risk                 | Not reported.<br>Comment: Probably not done                                                                                                                                                               |
| <b>Blinding of outcome assessment (detection bias)</b> | High risk                 | Not reported.<br>Comment: Probably not done                                                                                                                                                               |
| <b>Incomplete outcome data (attrition bias)</b>        | High risk                 | Number of participants at baseline has been reported.<br>Number of participants at follow-up has not been reported.<br>Exclusions and withdrawals have not been reported.                                 |
| <b>Selective reporting (reporting bias)</b>            | Unclear risk              | Pre-specified primary outcomes have been reported.<br>Secondary outcomes (EQ VAS, Tegner score) are incomplete, only significant improvement has been reported.<br>Low risk on primary outcome reporting. |
| <b>Other bias</b>                                      | Unclear risk              | Power analyses have been calculated. (72 patients per treat arm to provide at least 80% power to detect a difference of 7.4 points of the IKDC score at a 5 % level of significance).                     |

| Kon 2011                            |                                                                                                                                                                                                                                                                                                                                                                                                                                                                                                                                                                                                                                                         |
|-------------------------------------|---------------------------------------------------------------------------------------------------------------------------------------------------------------------------------------------------------------------------------------------------------------------------------------------------------------------------------------------------------------------------------------------------------------------------------------------------------------------------------------------------------------------------------------------------------------------------------------------------------------------------------------------------------|
| <b>Study type/Country/Treatment</b> | Prospective, three arm, comparative trial<br>Multicenter, Italy<br>PRP versus Hyaluronic Acid                                                                                                                                                                                                                                                                                                                                                                                                                                                                                                                                                           |
| <b>Participants</b>                 | Mean age: 52.9, % Female: 45.3%<br>Mean disease duration: NR<br>Number of participants: 150<br>Follow-up: 2 and 6 months<br><u>Inclusion:</u><br>Age: NR<br>Duration clinical symptoms : > 4 months<br>Symptomatic OA of the knee, radiological<br><b>Kellgren Lawrence</b> grade 0-IV<br><u>Baseline values:</u><br>Kellgren Lawrence grade (n):<br>0<br>PRP: 22<br>HAHW: 21<br>HALW: 19<br>I-III:<br>PRP: 20<br>HAHW: 19<br>HALW: 22<br>IV<br>PRP: 8<br>HAHW: 10<br>HALW: 9<br>IKDC score (mean(SD)):<br>PRP: 41.2(10.9)<br>HAHW: 47.3(13.9)<br>HALW: 44.7(6.6)<br>EQ-VAS score (mean(SD)):<br>PRP: 53.6 (18.3)<br>HAHW:52.2(12.5)<br>HALW: 51.2(7.8) |
| <b>Intervention</b>                 | <u>Intervention (n=50):</u><br>3 PRP (type 2A) intra articular injections (5mL)<br>Interval: 2 weeks<br><u>Comparison 1 (n=50):</u><br>3 HA intra articular injections (HW)<br>Interval: 2 weeks<br><u>Comparison 2 (n=50):</u><br>3 HA intra articular injections (LW)<br>Interval: 2 weeks                                                                                                                                                                                                                                                                                                                                                            |
| <b>Outcomes</b>                     | <u>Primary outcome(s):</u><br>IKDC score (0-100)<br>EQ-VAS score (0-100)<br><u>Secondary outcome(s):</u><br>Patient satisfaction (%N)<br>Adverse effects                                                                                                                                                                                                                                                                                                                                                                                                                                                                                                |
| <b>Results</b>                      | IKDC score 2 and 6 months resp. (mean(SD)):<br>PRP: 62.7(14.0), 64(18.7)<br>HAHW: 54.8(15.6), 54(16)<br>HALW: 61.7(13.1), 53.8(13.7)<br><i>P(6 mos follow up):PRP vs. HAHW 0.005</i><br><i>P(6 mos follow up): PRP vs. HALW 0.003</i>                                                                                                                                                                                                                                                                                                                                                                                                                   |

EQ-VAS score 2 and 6 months resp.  
(mean(SD)):  
PRP: 73.0(13.9), 72.3(17.3)  
HAHW: 63(14.7), 62.4(15.2)  
HALW: 68.7(13.5), 61.7(14.8)  
*P*(6 mos follow up):PRP vs. HAHW 0.002  
*P*(6 mos follow up):PRP vs. HALW 0.001  
Patient satisfaction:  
PRP: 82%  
HAHW:66%  
HALW:64%  
*P*=0.04  
Adverse effects:  
No short or long time side effects observed

| <b>Risk of bias (Kon 2011)</b>                         |                           |                                                                                                                                                                                     |
|--------------------------------------------------------|---------------------------|-------------------------------------------------------------------------------------------------------------------------------------------------------------------------------------|
| <b>Bias</b>                                            | <b>Authors' judgement</b> | <b>Support for judgement</b>                                                                                                                                                        |
| <b>Random sequence generation (selection bias)</b>     | High risk                 | Hospital visit specified treatment.<br>Comment: Probably not done.                                                                                                                  |
| <b>Allocation concealment (selection bias)</b>         | High risk                 | Each center performed only one treatment and so the patient treatment allocation was due to the center the patients attended.<br>Comment: Probably not done.                        |
| <b>Blinding of participants (performance bias)</b>     | High risk                 | Not reported.<br>Comment: Probably not done                                                                                                                                         |
| <b>Blinding of personnel (performance bias)</b>        | High risk                 | Not reported.<br>Comment: Probably not done                                                                                                                                         |
| <b>Blinding of outcome assessment (detection bias)</b> | High risk                 | Not reported.<br>Comment: Probably not done                                                                                                                                         |
| <b>Incomplete outcome data (attrition bias)</b>        | High risk                 | Number of participants at baseline has been reported. Number of participants at follow-up has not been reported. Exclusions and withdrawals have not been reported.                 |
| <b>Selective reporting (reporting bias)</b>            | Low risk                  | Pre-specified primary and secondary outcomes have been reported.                                                                                                                    |
| <b>Other bias</b>                                      | Unclear risk              | Power analysis has been calculated. (50 patients per treat arm to provide at least 80% power to detect a difference of 10 points of the IKDC score at a 5 % level of significance). |



Li 2011

|                                     |                                                                                                                                                                                                                                                                                                                                                                                                                                                                                                                                                                            |
|-------------------------------------|----------------------------------------------------------------------------------------------------------------------------------------------------------------------------------------------------------------------------------------------------------------------------------------------------------------------------------------------------------------------------------------------------------------------------------------------------------------------------------------------------------------------------------------------------------------------------|
| <b>Study type/Country/Treatment</b> | Randomized , two arm, controlled trial<br>Single Center, China<br>PRP versus Hyaluronic Acid                                                                                                                                                                                                                                                                                                                                                                                                                                                                               |
| <b>Participants</b>                 | Mean age:57.9, % Female:56.7%<br>Mean disease duration: > 4 months<br>Number of participants: 30<br>Follow-up: 3, 4 and 6 months<br><u>Inclusion:</u><br>OA on basis of Kellgren Lawrence grade I-IV<br><u>Baseline values:</u><br>Kellgren Lawrence grade (n):<br>I<br>PRP: 6<br>HA: 6<br>II<br>PRP: 2<br>HA: 3<br>III<br>PRP: 4<br>HA: 3<br>IV:<br>PRP: 3<br>HA: 3<br>IKDC score (mean(SD)):<br>PRP: 55.4(8.8)<br>HA: 57.5(9.4)<br>WOMAC score (mean(SD)):<br>Total:<br>PRP: 27.7(13.8)<br>HA: 30.9(13.9)<br>Lequesne index (mean(SD)):<br>PRP: 8.0(3.7)<br>HA: 9.3(2.9) |
| <b>Intervention</b>                 | <u>Intervention (n=15):</u><br>3 PRP intra articular injections (3.5mL)<br>Interval: 3 weeks<br><u>Comparison (n=15):</u><br>3 HA intra articular injections<br>(2 mL)<br>Interval: 3 weeks                                                                                                                                                                                                                                                                                                                                                                                |
| <b>Outcomes</b>                     | <u>Primary outcome(s):</u><br>IKDC score (0-100)<br>WOMAC total (0-96)<br>Lequesne index (0-24)<br>Adverse effects                                                                                                                                                                                                                                                                                                                                                                                                                                                         |
| <b>Results</b>                      | IKDC score 3 and 6 months resp. (mean(SD)):<br>PRP: 71.3(12.5), 76.4(13.5)<br>HA: 70.1(12.5), 63.2(11.9)<br><i>P=0.78, P=0.00</i><br>WOMAC total score 3 and 6 months (mean(SD)):<br>PRP: 13.3(9.4), 10.7(9.9)                                                                                                                                                                                                                                                                                                                                                             |

HA: 13.8(4.7), 20.6(8.3)  
*P=0.85, P=0.01*  
 Lequesne index 3 and 6 months resp.  
 (mean(SD)):  
 PRP: 4.8(2.4), 3.1(1.0)  
 HA: 4.7(2.0), 6.6(2.1)  
*P=0.87, P=0.00*  
 Adverse effects (N/Duration(h)(SD))  
 PRP:12/36.2(25.1)  
 HA:12/34.5(28.4)  
*P=0.86*

**Risk of bias (Li 2011)**

| <b>Bias</b>                                            | <b>Authors' judgement</b> | <b>Support for judgement</b> |
|--------------------------------------------------------|---------------------------|------------------------------|
| <b>Random sequence generation (selection bias)</b>     | Unclear risk              | No translation available     |
| <b>Allocation concealment (selection bias)</b>         | Unclear risk              | No translation available     |
| <b>Blinding of participants (performance bias)</b>     | Unclear risk              | No translation available     |
| <b>Blinding of personnel (performance bias)</b>        | Unclear risk              | No translation available     |
| <b>Blinding of outcome assessment (detection bias)</b> | Unclear risk              | No translation available     |
| <b>Incomplete outcome data (attrition bias)</b>        | Unclear risk              | No translation available     |
| <b>Selective reporting (reporting bias)</b>            | Unclear risk              | No translation available     |
| <b>Other bias</b>                                      | Unclear risk              | No translation available     |

| <b>Patel 2013</b>                   |                                                                                                                                                                                                                                                                                                                                                                                                                                                                                                                                                                                                                                                                                                                                                                                                                                                                                                                                                                            |
|-------------------------------------|----------------------------------------------------------------------------------------------------------------------------------------------------------------------------------------------------------------------------------------------------------------------------------------------------------------------------------------------------------------------------------------------------------------------------------------------------------------------------------------------------------------------------------------------------------------------------------------------------------------------------------------------------------------------------------------------------------------------------------------------------------------------------------------------------------------------------------------------------------------------------------------------------------------------------------------------------------------------------|
| <b>Study type/Country/Treatment</b> | Randomized, three arm, controlled trial<br>Single Center, India<br>PRP versus Placebo (Saline)                                                                                                                                                                                                                                                                                                                                                                                                                                                                                                                                                                                                                                                                                                                                                                                                                                                                             |
| <b>Participants</b>                 | <p>Mean age: 52.8, % Female: 70.7%<br/> Mean disease duration: NR<br/> Number Randomized: 78 (156 knees)<br/> Follow-up: 6 weeks, 3 and 6 months</p> <p><u>Inclusion:</u><br/> Age: NR<br/> Duration clinical symptoms: NR<br/> OA of the knee according ACR criteria,<br/> radiological <b>Ahlbäck</b> grade I or II</p> <p><u>Baseline values:</u><br/> Ahlbäck grade (n):<br/> I:<br/> PRP: 37<br/> 2PRP:36<br/> Saline:25<br/> II:<br/> PRP 11<br/> 2PRP:10<br/> Saline:18</p> <p>WOMAC score (mean (SD)):<br/> Pain:<br/> PRP: 10.17(3.82)<br/> 2PRP: 10.62(3.73)<br/> Saline: 9.04(3.73)<br/> Stiffness:<br/> PRP: 3.06(2.08)<br/> 2PRP:3.5(2.09)<br/> Saline:2.70(2.02)<br/> Physical function:<br/> PRP: 36.12(13.08)<br/> 2PRP: 39.10(11.34)<br/> Saline: 38.80(12.44)<br/> Total:<br/> PRP: 49.56(17.83)<br/> 2PRP: 53.20(16.18)<br/> Saline: 45.54(17.29)<br/> VAS pain<br/> (mean(SD)):<br/> PRP: 4.56(0.61)<br/> 2PRP: 4.64(0.56)<br/> Saline: 4.57(0.62)</p> |
| <b>Intervention</b>                 | <p><u>Intervention (n=27/52 knees):</u><br/> Single PRP (type 4B) intra articular injection<br/> (8mL)</p> <p><u>Comparison 1 (n=25/50 knees):</u><br/> 2 PRP (type 4B) intra articular injections (8mL)<br/> Interval: 3 weeks</p>                                                                                                                                                                                                                                                                                                                                                                                                                                                                                                                                                                                                                                                                                                                                        |

|                        |                                                                                                                                                                                                                                                                                                                                                                                                                                                                                                                                                                                                                                                                                                                                                                                                                                                                                                                                                                                                                                                                                                                                                                                                                                                                                                                                                                                                                                                       |
|------------------------|-------------------------------------------------------------------------------------------------------------------------------------------------------------------------------------------------------------------------------------------------------------------------------------------------------------------------------------------------------------------------------------------------------------------------------------------------------------------------------------------------------------------------------------------------------------------------------------------------------------------------------------------------------------------------------------------------------------------------------------------------------------------------------------------------------------------------------------------------------------------------------------------------------------------------------------------------------------------------------------------------------------------------------------------------------------------------------------------------------------------------------------------------------------------------------------------------------------------------------------------------------------------------------------------------------------------------------------------------------------------------------------------------------------------------------------------------------|
| <p><b>Outcomes</b></p> | <p><u>Comparison 2 (n=23/46 knees):</u><br/> Single saline intra articular injection (8mL)<br/> <u>Primary outcome(s):</u><br/> WOMAC Subscale pain (0-20)<br/> <u>Secondary outcome(s):</u><br/> WOMAC Subscale stiffness (0-8)<br/> WOMAC subscale physical function (0-68)<br/> WOMAC total (0-96)<br/> VAS pain score (0-10)<br/> Patient satisfaction (%N)<br/> (satisfied, partly satisfied, not satisfied)<br/> Adverse effects</p>                                                                                                                                                                                                                                                                                                                                                                                                                                                                                                                                                                                                                                                                                                                                                                                                                                                                                                                                                                                                            |
| <p><b>Results</b></p>  | <p>WOMAC subscale and total score 6 weeks, 3 and 6 months resp. (mean):<br/> Pain:<br/> PRP: 4.26, 3.74, 5.00<br/> 2PRP: 4.38, 4.88, 6.18<br/> Saline: 9.48, 10.35, 10.87<br/> <i>PRP vs. 2PRP: NS</i><br/> <i>PRP vs. Saline: P&lt;0.001</i><br/> <i>2PRP vs. Saline: P&lt; 0.001</i><br/> Stiffness:<br/> PRP: 2.12, 1.76, 2.10<br/> 2PRP: 2.28, 2.00, 1.88<br/> Saline: 2.76, 2.91, 2.76<br/> <i>PRP vs. 2PRP: NS</i><br/> <i>PRP vs. Saline: P&lt;0.001</i><br/> <i>2PRP vs. Saline: P&lt; 0.001</i><br/> Physical function:<br/> PRP: 18.98, 16.98, 20.08<br/> 2PRP: 18.30, 18.82, 22.40<br/> Saline: 34.54, 37.43, 39.46<br/> <i>PRP vs. 2PRP: NS</i><br/> <i>PRP vs. Saline: P&lt;0.001</i><br/> <i>2PRP vs. Saline: P&lt; 0.001</i><br/> Total:<br/> PRP: 25.36, 22.48, 27.18<br/> 2PRP: 24.96, 25.70, 30.48<br/> Saline: 46.78, 50.70, 53.09<br/> <i>PRP vs. 2PRP: NS</i><br/> <i>PRP vs. Saline: P&lt;0.001</i><br/> <i>2PRP vs. Saline: P&lt; 0.001</i><br/> VAS pain score 6 months (mean(SD)):<br/> PRP: 2.16(1.5)<br/> 2PRP: 2.54(1.7)<br/> Saline: 4.61(0.7)<br/> <i>PRP vs. 2PRP: P=0.410</i><br/> <i>PRP vs. Saline: P&lt;0.001</i><br/> <i>2PRP vs. Saline: &lt;0.001</i><br/> Patient satisfaction 6 months:<br/> PRP :67.3%<br/> 2PRP:64.0%<br/> Saline: 4.3%<br/> Adverse effects (%):<br/> Related to infiltration<br/> PRP: 22.2%<br/> 2PRP: 44%<br/> Saline: 0%<br/> Significant difference between PRP groups and Saline</p> |

---

**Risk of bias (Patel 2013)**

| <b>Bias</b>                                            | <b>Authors' judgement</b> | <b>Support for judgement</b>                                                                                                                                                                                                                                                            |
|--------------------------------------------------------|---------------------------|-----------------------------------------------------------------------------------------------------------------------------------------------------------------------------------------------------------------------------------------------------------------------------------------|
| <b>Random sequence generation (selection bias)</b>     | Low risk                  | Quote: "The participants were randomly divided by computer-derived random charts into 3 groups".<br>Comment: Probably done                                                                                                                                                              |
| <b>Allocation concealment (selection bias)</b>         | Unclear risk              | Not reported.<br>Comment: Insufficient information to permit judgement of "low risk" or "high risk"                                                                                                                                                                                     |
| <b>Blinding of participants (performance bias)</b>     | Unclear risk              | Quote: "...double blinded" - "...participants were blinded"<br>Comment: Different dosage used in comparison group 2 makes it difficult to blind these patients. Insufficient information about blinding of participants.                                                                |
| <b>Blinding of personnel (performance bias)</b>        | High risk                 | Not reported. Reporting "double blinded" means participants and observers.<br>Comment: Probably not done                                                                                                                                                                                |
| <b>Blinding of outcome assessment (detection bias)</b> | Low risk                  | Quote: "...by a blinded observer"<br>Comment: Blinding is reported and probably done.                                                                                                                                                                                                   |
| <b>Incomplete outcome data (attrition bias)</b>        | High risk                 | Number of allocated and analyzed participants has been reported. Reasons for missing data are reported. 1/27 was excluded from Intervention group as he underwent TKR elsewhere. 3/26 from comparison 2 group (placebo) did not received allocated intervention, refused for treatment. |
| <b>Selective reporting (reporting bias)</b>            | Unclear risk              | Pre-specified primary and secondary outcomes have been reported in the pre-specified way. Since no measure of dispersion (i.e. standard deviation, standard error) for primary outcome was reported, this outcome was not included in the RevMan analysis.                              |

---

|                   |              |                                                                                                                                                                                         |
|-------------------|--------------|-----------------------------------------------------------------------------------------------------------------------------------------------------------------------------------------|
| <b>Other bias</b> | Unclear risk | Power analysis has been calculated. (21 patients per treat arm to provide at least 80% power to detect a difference of 1.5 points in the VAS pain score at a 5 %level of significance). |
|-------------------|--------------|-----------------------------------------------------------------------------------------------------------------------------------------------------------------------------------------|

| <b>Say 2013</b>                     |                                                                                                                                                                                                                                                                                                                                                                                                                                                                                                                                                          |  |
|-------------------------------------|----------------------------------------------------------------------------------------------------------------------------------------------------------------------------------------------------------------------------------------------------------------------------------------------------------------------------------------------------------------------------------------------------------------------------------------------------------------------------------------------------------------------------------------------------------|--|
| <b>Study type/Country/Treatment</b> | Prospective, two arm, comparative trial<br>Single Center, Turkey<br>PRP versus Hyaluronic Acid                                                                                                                                                                                                                                                                                                                                                                                                                                                           |  |
| <b>Participants</b>                 | Mean age: 55.7, % Female: 87.8%<br>Mean disease duration: NR<br>Number of participants: 90<br>Follow-up: 3 and 6 months<br><u>Inclusion:</u><br>Age: NR<br>Duration clinical symptoms : > 3 months<br>Symptomatic OA of the knee, radiological<br><b>Kellgren Lawrence</b> grade I-III<br><u>Baseline values:</u><br>Kellgren Lawrence grade (N):<br>I<br>PRP: 1<br>HA: 1<br>II<br>PRP: 17<br>HA: 15<br>III<br>PRP: 27<br>HA: 29<br>KOOS score (mean(SD)):<br>PRP: 46(16.2)<br>HA:43.8(8.6)<br>VAS pain score (mean(SD)):<br>PRP: 7.3(1.6)<br>HA: 7(1.3) |  |
| <b>Intervention</b>                 | <u>Intervention (n=45):</u><br>Single PRP (type 4B) intra articular injection (2.5mL)<br><u>Comparison (n=45):</u><br>3 HA intra articular injections (LW)<br>Interval: 3 weeks                                                                                                                                                                                                                                                                                                                                                                          |  |
| <b>Outcomes</b>                     | <u>Primary outcome(s):</u><br>KOOS total score (0-100)<br>VAS pain score (0-10)<br><u>Secondary outcome(s):</u><br>Patient satisfaction<br>Adverse effects                                                                                                                                                                                                                                                                                                                                                                                               |  |
| <b>Results</b>                      | KOOS total score 3 and 6 months resp. (mean(SD)):<br>PRP: 76.9(7.5), 84.4(6.2)<br>HA: 68.6(3.7), 73.2(4.6)<br><i>P=0.02, P=0.001</i>                                                                                                                                                                                                                                                                                                                                                                                                                     |  |

VAS pain score 3 and 6 months resp.  
 (mean(SD)):  
 PRP:2.3(1.6), 1.7(1.4)  
 HA: 4.1(1.3), 3(1)  
*P=0.001, P=0.001*  
 Patient satisfaction: Not Reported  
 Adverse effects: Not reported

**Risk of bias (Say 2013)**

| <b>Bias</b>                                            | <b>Authors' judgement</b> | <b>Support for judgement</b>                                                                                           |
|--------------------------------------------------------|---------------------------|------------------------------------------------------------------------------------------------------------------------|
| <b>Random sequence generation (selection bias)</b>     | High risk                 | Quote: "...patients were separated into two groups of ..."<br>Comment: Probably not done.                              |
| <b>Allocation concealment (selection bias)</b>         | High risk                 | Allocation concealment probably not done                                                                               |
| <b>Blinding of participants (performance bias)</b>     | High risk                 | Different dosage used in both treatment groups.<br>Comment: Probably not done                                          |
| <b>Blinding of personnel (performance bias)</b>        | High risk                 | Not reported. Comment: Blinding of personnel is probably not done                                                      |
| <b>Blinding of outcome assessment (detection bias)</b> | High risk                 | Not reported. Comment: Blinding of outcome assessment is probably not done                                             |
| <b>Incomplete outcome data (attrition bias)</b>        | Unclear risk              | Number of participants at baseline and follow up has been reported. Exclusions and withdrawals have not been reported. |
| <b>Selective reporting (reporting bias)</b>            | Unclear risk              | Pre-specified primary outcomes have been reported, secondary outcome have not been reported.                           |
| <b>Other bias</b>                                      | High risk                 | No power analysis has been reported.                                                                                   |

| <b>Spaková 2012</b>                 |                                                                                                                                                                                                                                                                                                                                                                                                                                                                                                                                                                         |
|-------------------------------------|-------------------------------------------------------------------------------------------------------------------------------------------------------------------------------------------------------------------------------------------------------------------------------------------------------------------------------------------------------------------------------------------------------------------------------------------------------------------------------------------------------------------------------------------------------------------------|
| <b>Study type/Country/Treatment</b> | Prospective, two arm, comparative trial<br>Single Center, Slovakia<br>PRP versus Hyaluronic Acid                                                                                                                                                                                                                                                                                                                                                                                                                                                                        |
| <b>Participants</b>                 | Mean age: 53,0 % Female: 46.7%<br>Mean disease duration: NR<br>Number of participants: 120<br>Follow-up: 3 and 6 months<br><u>Inclusion:</u><br>Age: NR<br>Duration clinical symptoms : > 12 months<br>Symptomatic OA of the knee , radiological<br><b>Kellgren Lawrence</b> grade I-III<br><u>Baseline values:</u><br>Kellgren Lawrence grade (n):<br>I<br>PRP: 2<br>HA: 2<br>II<br>PRP: 39<br>HA: 37<br>III<br>PRP: 19<br>HA: 21<br>WOMAC score (mean(SD)):<br>PRP: 38.76(16.5)<br>HA: 43.21(13.7)<br>NRS pain score (mean(SD)):<br>PRP: 5.27(1.87)<br>HA: 6.02(1.77) |
| <b>Intervention</b>                 | <u>Intervention (n=60):</u><br>3 PRP (type 1B) intra articular injections<br>Interval: weekly<br><u>Comparison (n=60):</u><br>3 HA intra articular injections<br>Interval: weekly                                                                                                                                                                                                                                                                                                                                                                                       |
| <b>Outcomes</b>                     | <u>Primary outcome(s):</u><br>WOMAC total score (0-96)<br>NRS pain score (0-10)<br><u>Secondary outcome:</u><br>Adverse effects                                                                                                                                                                                                                                                                                                                                                                                                                                         |
| <b>Results</b>                      | WOMAC total score 3 and 6 months<br>resp.(mean(SD)):<br>PRP: 14.35(14.18), 18.85(14.09)<br>HA: 26.17(17.47), 30.90(16.57)                                                                                                                                                                                                                                                                                                                                                                                                                                               |



*P*<0.01, *P*<0.01  
 NRS pain score 3 and 6 months resp.  
 (mean(SD)):  
 PRP:2.06(2.02), 2.69(1.86)  
 HA: 3.98(2.27), 4.3(2.07)  
*P*<0.01, *P*<0.01  
 Adverse effects:  
 No short or long time side effects observed

**Risk of bias (Spaková 2012)**

| <b>Bias</b>                                        | <b>Authors' judgement</b> | <b>Support for judgement</b>                                                                                                                         |
|----------------------------------------------------|---------------------------|------------------------------------------------------------------------------------------------------------------------------------------------------|
| <b>Random sequence generation (selection bias)</b> | High risk                 | Quote: "Patients were randomly divided into two groups. The first group of 60 patients..."<br>Comment: Probably not done                             |
| Allocation concealment (selection bias)            | High risk                 | No allocation concealment has been reported.<br>Comment: Probably not done                                                                           |
| Blinding of participants (performance bias)        | High risk                 | No blinding of participants has been reported. Comment: Probably not done                                                                            |
| Blinding of personnel (performance bias)           | High risk                 | No blinding of personnel has been reported. Comment: Probably not done                                                                               |
| Blinding of outcome assessment (detection bias)    | High risk                 | No blinding of outcome assessment has been reported. Comment: Probably not done                                                                      |
| Incomplete outcome data (attrition bias)           | High risk                 | Number of participants at baseline and follow up has been reported only at 3 months of follow up. Exclusions and withdrawals have not been reported. |
| Selective reporting (reporting bias)               | Low risk                  | All pre-specified primary and secondary outcomes have been reported.                                                                                 |
| Other bias                                         | High risk                 | No power analysis has been reported.                                                                                                                 |

**Sánchez 2012**

|                                     |                                                                                                                                                                                                                                                                                                                                                                                                                                                                                                                                                                                                                                                                                                                                                                                       |
|-------------------------------------|---------------------------------------------------------------------------------------------------------------------------------------------------------------------------------------------------------------------------------------------------------------------------------------------------------------------------------------------------------------------------------------------------------------------------------------------------------------------------------------------------------------------------------------------------------------------------------------------------------------------------------------------------------------------------------------------------------------------------------------------------------------------------------------|
| <b>Study type/Country/Treatment</b> | Randomized, two arm, controlled trial<br>Multicenter, Spain<br>PRGF-Endoret versus Hyaluronic Acid                                                                                                                                                                                                                                                                                                                                                                                                                                                                                                                                                                                                                                                                                    |
| <b>Participants</b>                 | Mean age: 59.7, % Female: 51.7%<br>Mean disease duration: NR<br>Number Randomized: 176<br>Follow-up: 1, 2 and 6 months<br><u>Inclusion:</u><br>Age: between 40 and 72 y<br>Duration clinical symptoms : NR<br>OA of the knee according ACR criteria,<br>radiological <b>Ahlbäck</b> grade I- III<br><u>Baseline values:</u><br>Ahlbäck grade (n(%))<br>I<br>PRGF: 45(51)<br>HA: 42(49)<br>II<br>PRGF: 32(36)<br>HA: 32(38)<br>III<br>PRGF: 12(13)<br>HA: 11(13)<br>WOMAC score, normalized (mean, SD)<br>Pain:<br>PRGF: 40.4(16)<br>HA: 38.4(5.6)<br>Stiffness:<br>PRGF: 41.8(17.3)<br>HA: 38.5(18.3)<br>Physical function:<br>PRGF: 39.6(16.3)<br>HA: 38.8(17.4)<br>Global:<br>PRGF: 121.8(44.4)<br>HA: 115.6 (45.1)<br>Lequesne index (mean(SD)):<br>PRGF: 9.5(3.0)<br>HA: 9.1(3.2) |
| <b>Intervention</b>                 | <u>Intervention (n=89):</u><br>3 PRP (type 4B, PRGF) intra articular injections<br>Interval: weekly<br><u>Comparison (n=87):</u><br>3 HA intra articular injections                                                                                                                                                                                                                                                                                                                                                                                                                                                                                                                                                                                                                   |

|                 |                                                                                                                                                                                                                                                                                                                                                                                                                                                                                                                                                                                                                                                                                                                |
|-----------------|----------------------------------------------------------------------------------------------------------------------------------------------------------------------------------------------------------------------------------------------------------------------------------------------------------------------------------------------------------------------------------------------------------------------------------------------------------------------------------------------------------------------------------------------------------------------------------------------------------------------------------------------------------------------------------------------------------------|
| <b>Outcomes</b> | <p>Interval: weekly</p> <p><u>Primary outcome(s):</u><br/>% of patients having a 50% decrease in the summed WOMAC pain subscale score</p> <p><u>Secondary outcome(s):</u><br/>Normalized WOMAC total score (0-300)<br/>Normalized WOMAC pain score (0-100)<br/>Normalized WOMAC stiffness score (0-100)<br/>Normalized WOMAC physical function score<br/>Lequesne index (0-24)<br/>Adverse effects</p>                                                                                                                                                                                                                                                                                                         |
| <b>Results</b>  | <p>50% decrease WOMAC pain score 6 months (N(%)):<br/>PRGF: 34(38.2)<br/>HA: 21(24.1)<br/><i>P=0.044</i></p> <p>Normalized WOMAC total score 6 months (mean(SD)):<br/>PRGF:74.0(42.7)<br/>HA:78.3(48.1)<br/><i>P=0.561</i></p> <p>Normalized WOMAC Pain score 6 months (mean(SD)):<br/>PRGF:24.1(15.5)<br/>HA:26.9(15.8)<br/><i>P=0.265</i></p> <p>PRGF:25.2(15.4)<br/>HA:25.5(17.9)<br/><i>P=0.901</i></p> <p>PRGF:24.8(15.9)<br/>HA:25.9(17.2)<br/><i>P=0.682</i></p> <p>Lequesne index 6 months (mean(SD)):<br/>PRGF: 5.2(3.4)<br/>HA: 5.4(3.3)<br/><i>P=0.714</i></p> <p>Adverse effects: No significant difference (<i>P=0.811</i>) between groups and most are not related to the type of treatment.</p> |

| <b>Risk of bias (Sánchez 2012)</b>                 |                           |                                                                                                                                                                                                                                        |
|----------------------------------------------------|---------------------------|----------------------------------------------------------------------------------------------------------------------------------------------------------------------------------------------------------------------------------------|
| <b>Bias</b>                                        | <b>Authors' judgement</b> | <b>Support for judgement</b>                                                                                                                                                                                                           |
| <b>Random sequence generation (selection bias)</b> | Low risk                  | Quote: "... the treatment assigned by randomization was delivered. A stratified randomization (1 stratum per center) was carried out".<br>Randomization was carried out by using specific computer software.<br>Comment: Probably done |
| Allocation concealment (selection bias)            | Low risk                  | Quote: "...keeping that relation in a sealed envelope". „This envelope was not opened until the moment before applying the treatment".<br>Comment: Probably done                                                                       |

|                                                 |           |                                                                                                                                                                                                                                    |
|-------------------------------------------------|-----------|------------------------------------------------------------------------------------------------------------------------------------------------------------------------------------------------------------------------------------|
| Blinding of participants (performance bias)     | Low risk  | No difference between the intervention and comparison group regarding dosage. The application area was hidden from view and blood was drawn for all patients.<br>Comment: probably done                                            |
| Blinding of personnel (performance bias)        | High risk | Not reported. Reporting "double blinded" means participants and observers.<br>Comment: Probably not done                                                                                                                           |
| Blinding of outcome assessment (detection bias) | Low risk  | Quote: "Response was assessed by researchers not involved in the application of treatment. The data report forms did not make any references to the treatment applied".<br>Comment: Probably done                                  |
| Incomplete outcome data (attrition bias)        | Low risk  | Analysis: Intention to treat. Number of patients randomized and analyzed was reported. The exclusion and withdrawal percentages did not differ significantly between groups                                                        |
| Selective reporting (reporting bias)            | Low risk  | All pre-specified primary and secondary outcomes have been reported in the pre-specified way.                                                                                                                                      |
| Other bias                                      | Low risk  | Power analysis has been calculated. (110 patients per treat arm to provide at least 90% power to detect differences in the proportions of patients achieving 50% pain improvement with PRGF vs HA at a 5 % level of significance). |

---

**Vaquerizo 2013****Study type/Country/Treatment**

Randomized, two arm, controlled trial  
Multicenter, Spain  
PRGF-Endoret versus Durolane Hyaluronic Acid

**Participants**

Mean age: 63.6, % Female: 60.4  
Mean disease duration: NR  
Number Randomized: 96  
Follow-up: 24 and 48 weeks  
Inclusion:  
Age: > 50 y  
Clinical symptoms: > 6 months  
OA of the knee according ACR criteria,  
radiological **Kellgren Lawrence** grade II to IV  
Baseline values:  
Kellgren Lawrence grade n(%):  
II  
PRGF: 14(29.2)  
HA: 18 (37.5)  
III  
PRGF: 26(54.2)  
HA: 21(43.8)  
IV  
PRGF: 8(16.7)  
HA: 9(18.8)  
WOMAC score (mean (SD)):  
Pain  
PRGF: 9.6(2.5)  
HA: 10.2(3.5)  
Stiffness:  
PRGF: 3.7(1.7)  
HA: 4.0(2.0)  
Physical function:  
PRGF: 32.6(9.9)  
HA: 36.7(13.7)  
Total:  
PRGF: 45.9(12.7)  
HA: 50.8(18.4)  
Lequesne Index:  
(mean(SD))  
PRGF: 12.8(3.8)  
HA: 13.1(3.8)

**Intervention**

Intervention (n=48):

---

|                 |                                                                                                                                                                                                                                                                                                                                                                                                                                                                                                                                                                                                                                                                                                                                                                                                                                                                                                                                                                                                                                                                                                                                                                                                                                                                  |
|-----------------|------------------------------------------------------------------------------------------------------------------------------------------------------------------------------------------------------------------------------------------------------------------------------------------------------------------------------------------------------------------------------------------------------------------------------------------------------------------------------------------------------------------------------------------------------------------------------------------------------------------------------------------------------------------------------------------------------------------------------------------------------------------------------------------------------------------------------------------------------------------------------------------------------------------------------------------------------------------------------------------------------------------------------------------------------------------------------------------------------------------------------------------------------------------------------------------------------------------------------------------------------------------|
|                 | <p>3 PRP (type 4B, PRGF) intra articular injection (8mL)<br/>Interval: 2 weeks<br/><u>Comparison (n=48)</u><br/>Single HA (Durothane) intra-articular injection</p>                                                                                                                                                                                                                                                                                                                                                                                                                                                                                                                                                                                                                                                                                                                                                                                                                                                                                                                                                                                                                                                                                              |
| <b>Outcomes</b> | <p><u>Primary outcome(s):</u><br/>% of patients having a 30% decrease and 50% decrease in the summed WOMAC subscale scores –pain, stiffness and physical function and Lequesne index</p> <p><u>Secondary outcome(s):</u><br/>WOMAC subscales pain (0-20), stiffness (0-8), physical function (0-68) and total score (0-96)<br/>Lequesne scale (0-24)</p> <p>Adverse effects</p>                                                                                                                                                                                                                                                                                                                                                                                                                                                                                                                                                                                                                                                                                                                                                                                                                                                                                  |
| <b>Results</b>  | <p>30% decrease WOMAC score 24 and 48 weeks resp. (N(%)):<br/>Pain:<br/>PRGF: 40(83), 28(58.3)<br/>HA: 7(17), 5(11.9)<br/><i>P&lt;0.001, P&lt;0.001</i></p> <p>Stiffness:<br/>PRGF: 24(52), 24(52.2)<br/>HA: 11(27), 5(12.2)<br/><i>P&lt;0.02, P&lt;0.001</i></p> <p>Physical function:<br/>PRGF: 29(60), 26(54.2)<br/>HA: 7(17), 7(16.7)<br/><i>P&lt;0.001, P&lt;0.001</i></p> <p>50% decrease WOMAC score (N(%))<br/>Pain:<br/>PRGF: 26(54), 15(31)<br/>HA: 5(11), 1(2)<br/><i>P&lt;0.001, P&lt;0.001</i></p> <p>Stiffness:<br/>PRGF: 16(35), 16(33)<br/>HA: 7(16), 2(5)<br/><i>P=0.035, P=0.001</i></p> <p>Physical function:<br/>PRGF: 19(40), 15(31)<br/>HA: 5(11), 0(0)<br/><i>P=0.001, P=0.001</i></p> <p>30% decrease Lequesne (N(%)):<br/>PRGF: 35(73), 23(47.9)<br/>HA: 7(17), 1(2.4)<br/><i>P&lt;0.001, P&lt;0.001</i></p> <p>50% decrease Lequesne (N(%)):<br/>PRGF: 14(29), 9(19)<br/>HA: 2(4), 1(2)<br/><i>P=0.002, P=0.017</i></p> <p>WOMAC total score 24 and 48 weeks resp. (mean(SD)):<br/>PRGF: 27.2(15.1), 30.8(15.5)<br/>HA: 50.4(23.2), 54.2(19.2)<br/><i>P&lt;0.001, P&lt;0.001</i></p> <p>Lequesne index 24 and 48 weeks resp. (mean(SD)):<br/>PRGF: 5.2(3.4), 8.9(3.7)<br/>HA: 5.4(3.3), 14.4 (3.8)<br/><i>P=&lt;0.001, P=0.001</i></p> |

Adverse effects:  
 PRGF: 14.6%  
 HA: 18.8%  
 PRGF vs. HA:  $P=,610$   
 Withdrawals:  
 PRGF: 0  
 HA: 1

**Risk of bias (Vaquerizo 2013)**

| Bias                                            | Authors' judgement | Support for judgement                                                                                                                                                                                                                                                                                 |
|-------------------------------------------------|--------------------|-------------------------------------------------------------------------------------------------------------------------------------------------------------------------------------------------------------------------------------------------------------------------------------------------------|
| Random sequence generation (selection bias)     | Low risk           | Quote: "A simple randomization was carried out"<br>Comment: Probably done. The use of specific software for randomization as a random component in the sequence generation process was described.                                                                                                     |
| Allocation concealment (selection bias)         | Low risk           | Quote: "..keeping that relation in a sealed envelope"<br>Comment: Probably done. The envelope was not opened until the moment before the treatment was applied.                                                                                                                                       |
| Blinding of participants (performance bias)     | High risk          | Different dosage used in both treatment groups makes it impossible to blind the patients.<br>Comment: Probably not done                                                                                                                                                                               |
| Blinding of personnel (performance bias)        | High risk          | Different dosage, preparation of PRGF at each treatment visit and insufficient information about blinding personnel makes blinding of personnel dubious.<br>Comment: Probably not done                                                                                                                |
| Blinding of outcome assessment (detection bias) | Low risk           | Quote: „The response was assessed by researchers not involved in the application of treatment. In the data report forms, there was no reference to the treatment that had been applied. The evaluation of the patients' status and disease progression was performed by physicians in a blinded way". |

|                                          |              |                                                                                                                                                                                                                                                                                                                   |
|------------------------------------------|--------------|-------------------------------------------------------------------------------------------------------------------------------------------------------------------------------------------------------------------------------------------------------------------------------------------------------------------|
| Incomplete outcome data (attrition bias) | High risk    | Comment: Probably done<br>Number of allocated and analyzed participants was reported.<br>6 months follow up: No missing data in both groups.<br>12 months follow up: No missing in intervention group and 6/48 missing from comparison group<br>Comment: Differ across groups at longer term outcome (> 6 months) |
| Selective reporting (reporting bias)     | Low risk     | All pre-specified primary and secondary outcomes have been reported in the pre-specified way.                                                                                                                                                                                                                     |
| Other bias                               | Unclear risk | Power analysis has been calculated. (48 patients per group to provide at least 80% power to detect differences in the WOMAC pain scale superior to 1.2 for PGRF vs HA at a 5 %level of significance taking into account 10% losses).<br>Per protocol analysis                                                     |

*Characteristics of excluded studies*

| Study                                    | Reason for exclusion                                                              |
|------------------------------------------|-----------------------------------------------------------------------------------|
| Yang 2008                                | Intervention of interest: Autologous conditioned serum (Orthokine)                |
| Baltzer 2009                             | Intervention of interest: Autologous conditioned serum (Orthokine)                |
| Klatt 2011                               | Point/counterpoint discussion: Total knee arthroplasty versus PRP                 |
| ClinicalTrail.gov identifier NCT00728611 | Study has been completed. Unfortunately, no additional information was available. |

*Characteristics of ongoing studies*

| Laver 2011   |                                                                                                                                                                                                                                                  |
|--------------|--------------------------------------------------------------------------------------------------------------------------------------------------------------------------------------------------------------------------------------------------|
| Study name   | Platelet Rich Plasma (PRP) as a Treatment for Knee Osteoarthritis - A Randomized-Double-Blind Trial                                                                                                                                              |
| Methods      | Randomized, two arm, controlled trial                                                                                                                                                                                                            |
| Participants | Patients with knee osteoarthritis, age between 40 and 75 years old.<br>Inclusion: diagnosed osteoarthritis of the knee more than 1 year, no knee deformation.<br>Exclusion: mental or physical disabilities, pregnancy, deformities of the knee. |
| Intervention | Biological: Platelet rich plasma (PRGF)<br>Drug: Hyaluronic acid (HA)                                                                                                                                                                            |
| Outcomes     | Primary outcome: Improvement in pain, function, quality of life and activity level in OA of the knee                                                                                                                                             |



|                                      |                                                      |
|--------------------------------------|------------------------------------------------------|
|                                      | 1-2 years                                            |
| <b>Starting date</b>                 | September 2011                                       |
| <b>Contact information</b>           | Lior Laver tel: +972-50-8464466<br>laver17@gmail.com |
| <b>Notes</b>                         | Study not yet open for participant recruitment       |
| <b>ClinicalTrials.gov identifier</b> | NCT01270412                                          |

|                                      |                                                                                                                                                                                                                                                                                                                                                                                                                                                                                                                                                                                                                                                                                              |
|--------------------------------------|----------------------------------------------------------------------------------------------------------------------------------------------------------------------------------------------------------------------------------------------------------------------------------------------------------------------------------------------------------------------------------------------------------------------------------------------------------------------------------------------------------------------------------------------------------------------------------------------------------------------------------------------------------------------------------------------|
| <b>Nayana 2011</b>                   |                                                                                                                                                                                                                                                                                                                                                                                                                                                                                                                                                                                                                                                                                              |
| <b>Study name</b>                    | A prospective, Randomized, Double-blinded, Clinical Trail, Comparing Platelet-rich Plasma Intra articular Knee Injections Versus Corticosteroid Intra-articular Knee injections for Knee Osteoarthritis                                                                                                                                                                                                                                                                                                                                                                                                                                                                                      |
| <b>Methods</b>                       | Randomized, two arm, controlled trial                                                                                                                                                                                                                                                                                                                                                                                                                                                                                                                                                                                                                                                        |
| <b>Participants</b>                  | Patients with knee osteoarthritis, age between 40 and 80 years old.<br>Inclusion: degenerative OA of the knee confirmed radiologically, degenerative osteoarthritis of the knee replacement candidate, walking ability in patients with or without external support and baseline in pain VAS greater than 60<br>Exclusion: neoplastic disease, immunosuppressive states, received IA injections of steroids, anesthetic and/or HA in the last 3 months, patients who have undergone arthroscopic surgery on the last 3 months, patients with involvement of bone metabolism except osteoporosis, fibromyalgia, liver disease, deficit coagulation, thrombocytopenia, anticoagulant treatment |
| <b>Intervention</b>                  | Biological: platelet-rich plasma<br>Drug: Corticosteroid                                                                                                                                                                                                                                                                                                                                                                                                                                                                                                                                                                                                                                     |
| <b>Outcomes</b>                      | Primary outcome: Visual analogue pain scale (VAS) one moment after treatment.<br>Secondary outcome: Visual analogue pain scale (VAS) one, three and six months after treatment, adverse events, scale of the SF 36 quality of life one, three and six months after treatment.                                                                                                                                                                                                                                                                                                                                                                                                                |
| <b>Starting date</b>                 | July 2011                                                                                                                                                                                                                                                                                                                                                                                                                                                                                                                                                                                                                                                                                    |
| <b>Contact information</b>           | Nayana Joshi tel: 0034934893481<br>njoshijubert@gmail.com                                                                                                                                                                                                                                                                                                                                                                                                                                                                                                                                                                                                                                    |
| <b>Notes</b>                         | Study is ongoing, but not recruiting participants                                                                                                                                                                                                                                                                                                                                                                                                                                                                                                                                                                                                                                            |
| <b>ClinicalTrials.gov identifier</b> | NCT01381081                                                                                                                                                                                                                                                                                                                                                                                                                                                                                                                                                                                                                                                                                  |
